# Supplementary material for: Enhanced osteogenic differentiation and biomineralization in mouse mesenchymal stromal cells on a β-TCP robocast scaffold modified with collagen nanofibers
Source: Royal Society of Chemistry journal article supplement (doi:10.1039/c5ra26670j), 2016-01-01
Supplement: c5ra26670j1.pdf [file c5ra26670j1.pdf]

### Supplementary Material

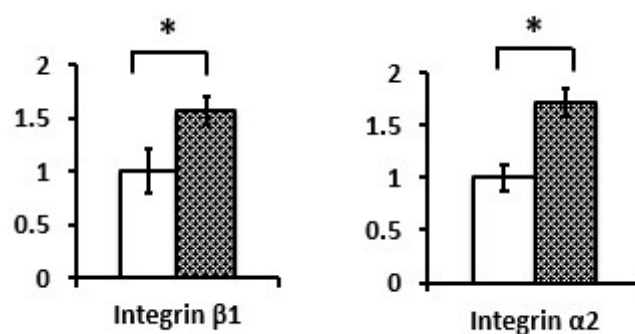

Figure S1. The gene expression of integrin  $\beta 1$  and  $\alpha 2$  relative to the housekeeping gene GAPDH by mMSCs on either the sintered  $\beta$ -TCP scaffolds or collagen gel coated scaffolds. \* Statistically significant,  $p < 0.05$
